# Supplementary material for: Age differences in contemporary treatment of patients with chronic heart failure and reduced ejection fraction
Source: PubMed Central journal article supplement — Eur J Prev Cardiol. 2019 Mar 13;26(13):1399–407. doi: 10.1177/2047487319835042 (PMC6696738; doi:10.1177/2047487319835042), 2019-03-13

**Supplementary Table 1.** Target doses of guideline recommended therapy

|                      |        |
|----------------------|--------|
| <b>Beta-blocker</b>  |        |
| Bisoprolol           | 10 mg  |
| Carvedilol           | 50 mg  |
| Metoprolol succinate | 200 mg |
| Nebivolol            | 10 mg  |
| <b>ACE-inhibitor</b> |        |
| Captopril            | 150 mg |
| Enalapril            | 20 mg  |
| Lisinopril           | 40 mg  |
| Ramipril             | 10 mg  |
| Perindopril          | 8 mg   |
| <b>ARB</b>           |        |
| Candesartan          | 32 mg  |
| Losartan             | 150 mg |
| Valsartan            | 320 mg |
| <b>MRA</b>           |        |
| Eplerenone           | 50 mg  |
| Spironolactone       | 25 mg  |

ACE, angiotensin-converting enzyme; ARB, angiotensin II receptor blocker; MRA, mineralocorticoid receptor antagonist

**Supplementary Table 2.** Patient characteristics of HF patients according to 2016 ESC HF Guideline

|                          | HFrEF (n=6,786) | HFmrEF (n=1,574) | p-value |
|--------------------------|-----------------|------------------|---------|
| Age (years)              | 71.9 ± 11.8     | 73.7 ± 11.7      | p<0.01  |
| Male gender              | 4,403 (65.2)    | 917 (58.4)       | p<0.01  |
| BMI, kg/m <sup>2</sup>   | 27.2 ± 5.1      | 27.5 ± 5.4       | p<0.01  |
| <b>NYHA</b>              |                 |                  |         |
| I                        | 1,029 (15.3)    | 284 (18.2)       |         |
| II                       | 3,838 (57.2)    | 854 (54.8)       |         |
| III                      | 1,716 (25.6)    | 392 (25.2)       | p<0.01  |
| IV                       | 121 (1.8)       | 28 (1.8)         |         |
| LVEF, %                  | 29.3 ± 9.0      | 45.0 ± 5.4       | p<0.01  |
| <b>Cause of HF</b>       |                 |                  |         |
| Ischemic cause of HF     | 3,491 (53.1)    | 691 (45.4)       |         |
| Non-ischemic cause of HF | 3,082 (46.9)    | 830 (54.6)       | p<0.01  |
| Systolic BP, mmHg        | 124.8 ± 20.4    | 129.5 ± 21.6     | p<0.01  |
| Diastolic BP, mmHg       | 71.1 ± 11.2     | 71.8 ± 12.0      | p<0.01  |
| Heart rate, bpm          | 71.9 ± 13.8     | 72.5 ± 14.3      | p=0.03  |
| Atrial fibrillation      | 1,575 (23.5)    | 534 (34.3)       | p<0.01  |
| LBBB                     | 1,198 (17.7)    | 216 (13.7)       | p<0.01  |
| QRS ≥130 ms              | 2,358 (42.0)    | 416 (31.5)       | p<0.01  |
| eGFR                     | 60.3 ± 24.7     | 56.2 ± 23.7      | p<0.01  |
| <b>eGFR</b>              |                 |                  |         |
| <30                      | 534 (10.9)      | 133 (13.7)       |         |
| 30-59                    | 2,003 (40.8)    | 439 (45.1)       | p<0.01  |
| ≥60                      | 2,373 (48.3)    | 401 (41.2)       |         |
| <b>Comorbidity</b>       |                 |                  |         |

|                         |              |            |        |
|-------------------------|--------------|------------|--------|
| Hypertension            | 2,359 (38.9) | 619 (43.7) | p<0.01 |
| Diabetes Mellitus       | 1,777 (29.3) | 397 (28.0) | p=0.10 |
| COPD                    | 1,090 (18.0) | 291 (20.5) | p=0.03 |
| OSAS                    | 379 (6.2)    | 116 (8.2)  | p<0.01 |
| Thyroid disease         | 446 (7.3)    | 111 (7.8)  | p=0.40 |
| Renal insufficiency †   | 3,205 (55.4) | 745 (60.9) | p<0.01 |
| No relevant comorbidity | 757 (14.6)   | 98 (9.0)   | p<0.01 |

BMI, Body Mass Index; NYHA, New York Heart Association classification; LVEF, Left Ventricular Ejection Fraction; HF, Heart Failure; BP, Blood Pressure; LBBB, Left-Bundle Branch Block; eGFR, estimated Glomerular Filtration Rate; NT-proBNP, N-terminal pro Brain Natriuretic Peptide; COPD, Chronic Obstructive Pulmonary Disease; OSAS, Obstructive Sleep Apnea Syndrome.

† Defined as eGFR <60mL/min or a history of renal failure

Supplementary figure 1

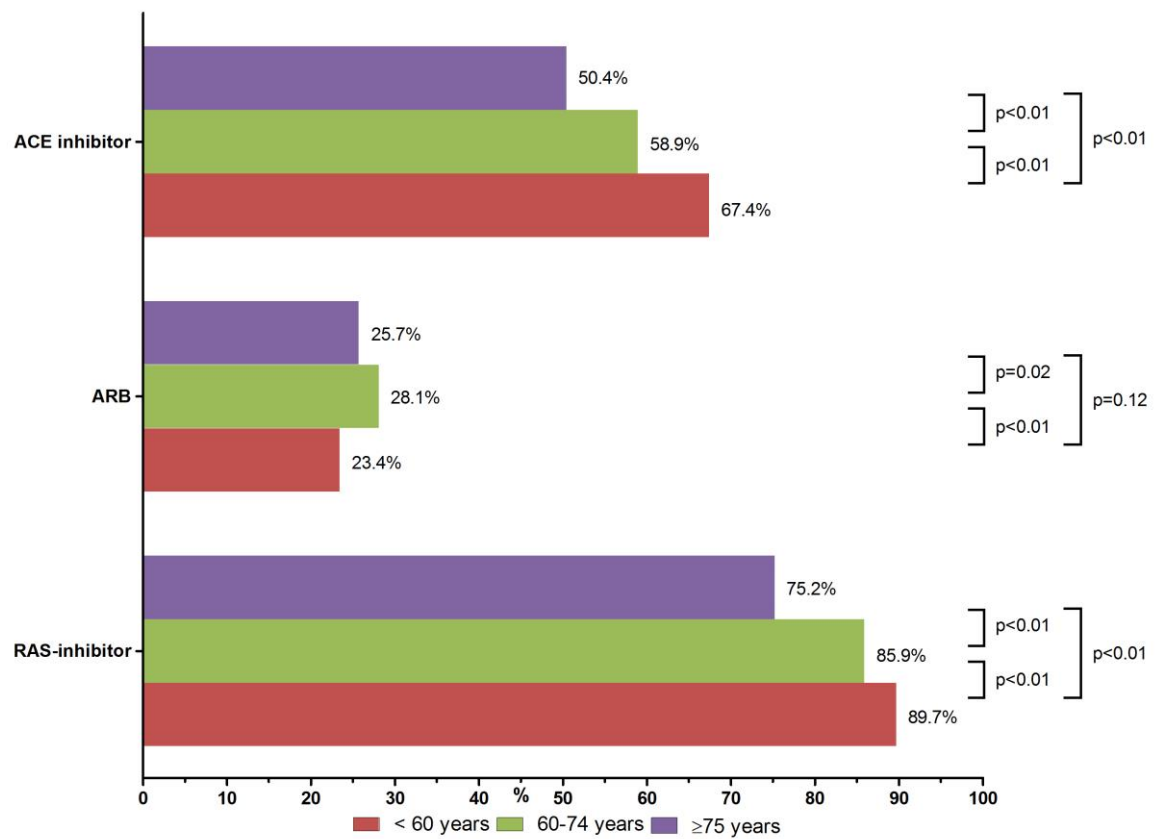

Supplementary figure 2

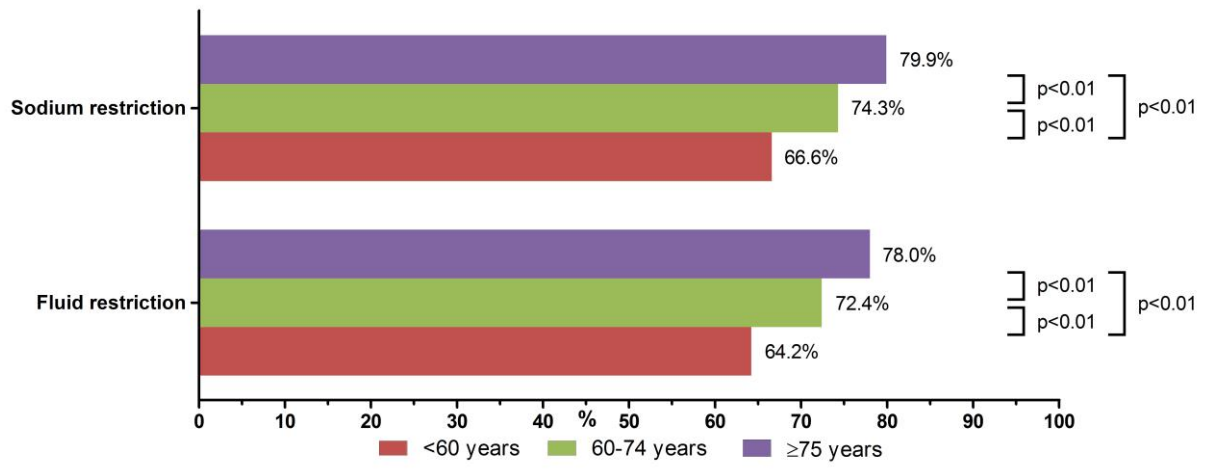

Supplement: Supplemental_Material.pdf [file Supplemental_Material.pdf]
